# Supplementary material for: Bimetallic MOFs-Derived Hollow Carbon Spheres Assembled by Sheets for Sodium-Ion Batteries
Source: MDPI journal article supplement (doi:10.3390/nano12213926), 2022-11-07
Supplement: s1 [file s1]

# Bimetallic MOFs-Derived Hollow Carbon Spheres Assembled by Sheets for Sodium-Ion Batteries

Hui Yang <sup>1</sup>, Ang Li <sup>1,\*</sup>, Chunli Zhou <sup>1,2</sup>, Xuwei Liu <sup>1</sup>, Xiaohong Chen <sup>1</sup>, Haiyan Liu <sup>3</sup>, Tao Liu <sup>3</sup> and Huaihe Song <sup>1,\*</sup>

<sup>1</sup> State Key Laboratory of Chemical Resources Engineering, Beijing Key Laboratory of Electrochemical Process and Technology for Materials, Beijing University of Chemical Technology, Beijing 100029, China

<sup>2</sup> Tangshan Key Laboratory of Optoelectronic Conversion Materials, School of Physical Science and Technology, Tangshan Normal University, Tangshan 063000, China

<sup>3</sup> Shandong Energy Group Ltd., Zhoucheng 277527, China

\* Correspondence: li\_ang@mail.buct.edu.cn (A.L.); songhh@mail.buct.edu.cn (H.S.); Tel.: +86-10-64434916 (H.S.)

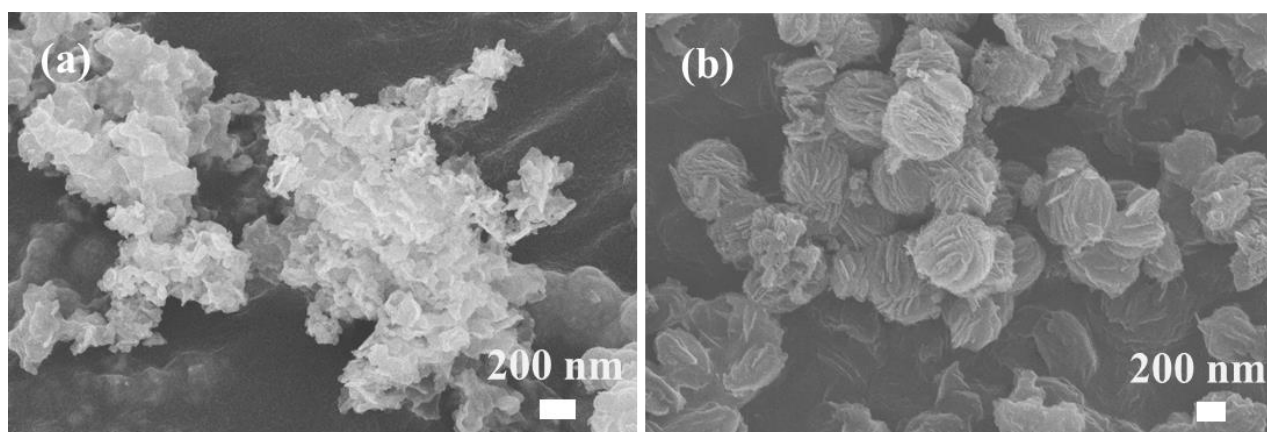

**Figure S1.** (a) SEM image of Co/C; (b) SEM image of CoCu/C.

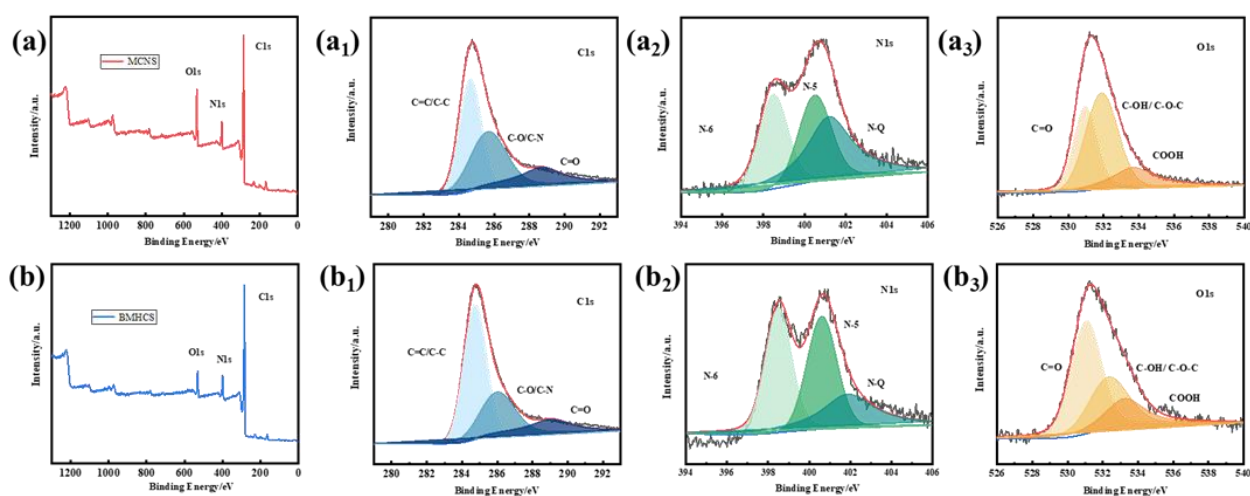

**Figure S2.** (a) XPS survey spectrum; (a1) C1s spectra; (a2) N1s spectra; (a3) O1s spectra of MCNS; (b) XPS survey spectrum; (b1) C1s spectra; (b2) N1s spectra; (b3) O1s spectra of BMHCS.

**Table S1.** Elemental composition of MCNS and BMHCS according to XPS test.

| Sample | N /at% | N-5  | N-6  | N-Q  | O /at% | C=O  | C-OH/C-O-C | COOH |
|--------|--------|------|------|------|--------|------|------------|------|
| MCNS   | 9.72   | 3.04 | 2.86 | 3.82 | 11.25  | 3.74 | 5.63       | 1.88 |
| BMHCS  | 10.04  | 3.89 | 3.69 | 2.46 | 6.17   | 3.18 | 1.85       | 1.14 |

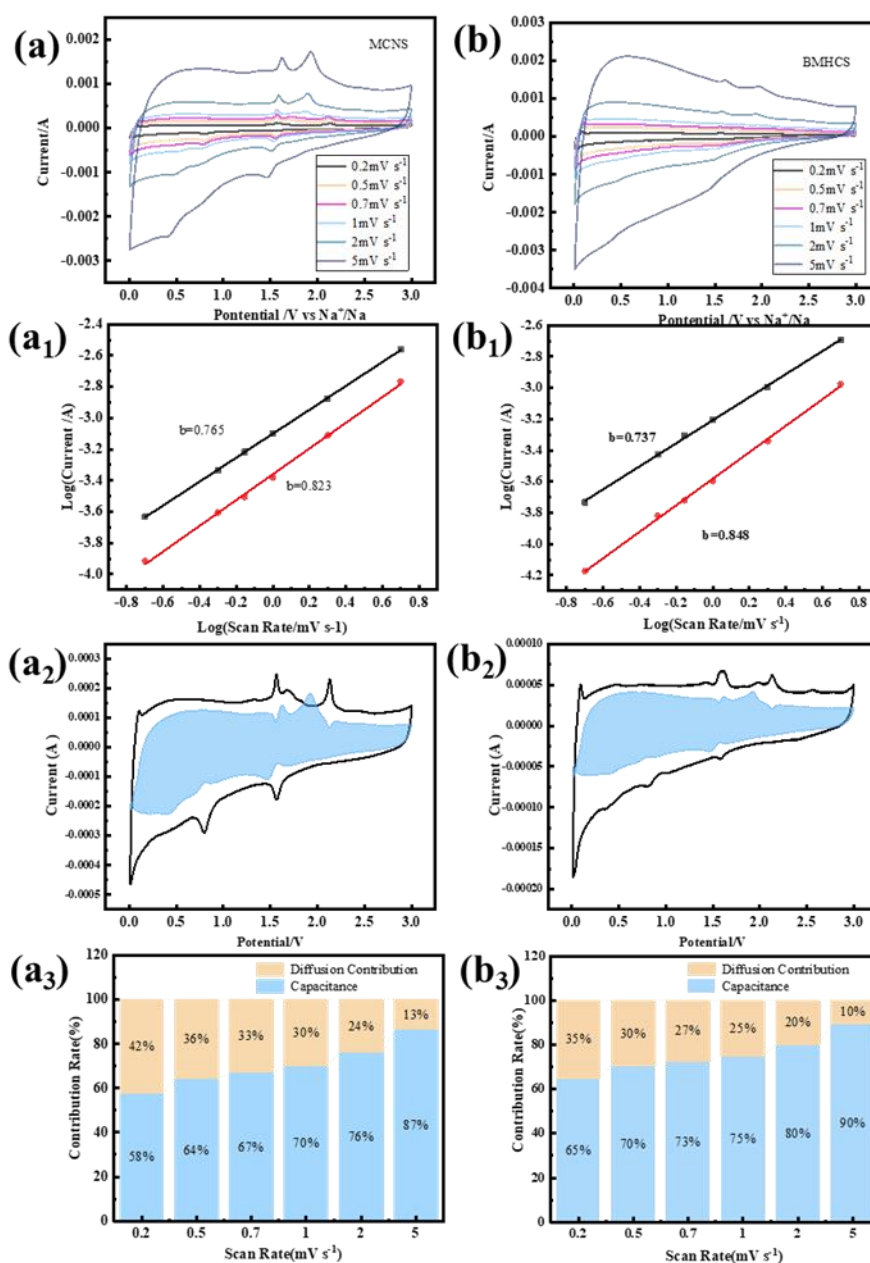

**Figure S3.** (a, b) CV curves at different scanning rates; (a<sub>1</sub>, b<sub>1</sub>) The fitted linearity between redox peak current and the square root of the scan rate; (a<sub>2</sub>, b<sub>2</sub>) CV curve at 0.2 mV s<sup>-1</sup>, shaded part represents capacitive contribution; (a<sub>3</sub>, b<sub>3</sub>) Contribution rate of the capacitive and diffusion-controlled at different scanning rates of MCNS and BMHCS.

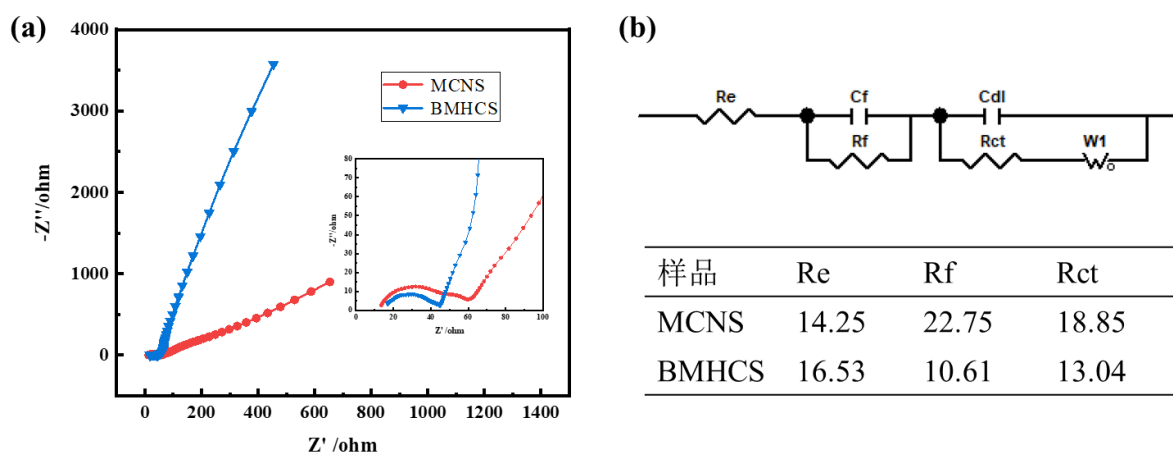

**Figure S4.** (a) Impedance profiles; (b) Equivalent circuit diagram and parameters of MCNS and BMHCS.
